# Supplementary material for: An R-CaMP1.07 reporter mouse for cell-type-specific expression of a sensitive red fluorescent calcium indicator
Source: PLOS journal article supplement (doi:10.1371/journal.pone.0179460), 2017-06-22
Supplement: S5 (10.1371/journal.pone.0179460.s005) [file journal.pone.0179460.s005]

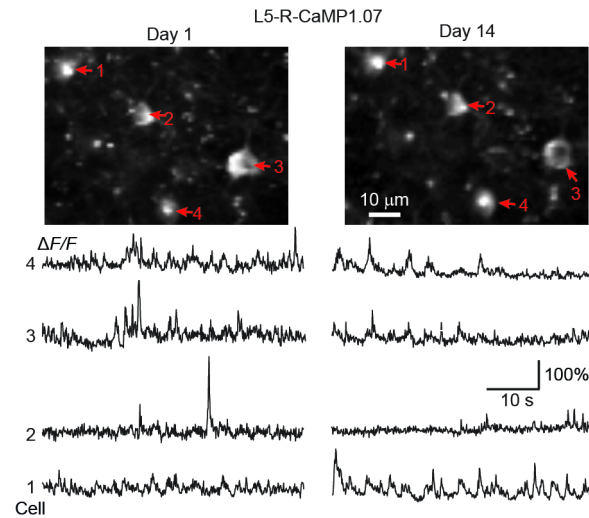

**S5 Fig. Repeated functional imaging of R-CaMP1.07 signals from L5 neurons.** Top: Two-photon images of example L5 neurons in a L5-R-CaMP1.07 mouse taken two weeks apart. Bottom: Repeatedly measured spontaneous somatic  $\Delta F/F$  calcium signals for the 4 example neurons marked in the images.
